# Supplementary material for: BH4 activates CaMKK2 and rescues the cardiomyopathic phenotype in rodent models of diabetes
Source: PubMed Central journal article supplement (PMC7383063; doi:10.26508/lsa.201900619), 2020-07-22

Fig 4D. Western blot

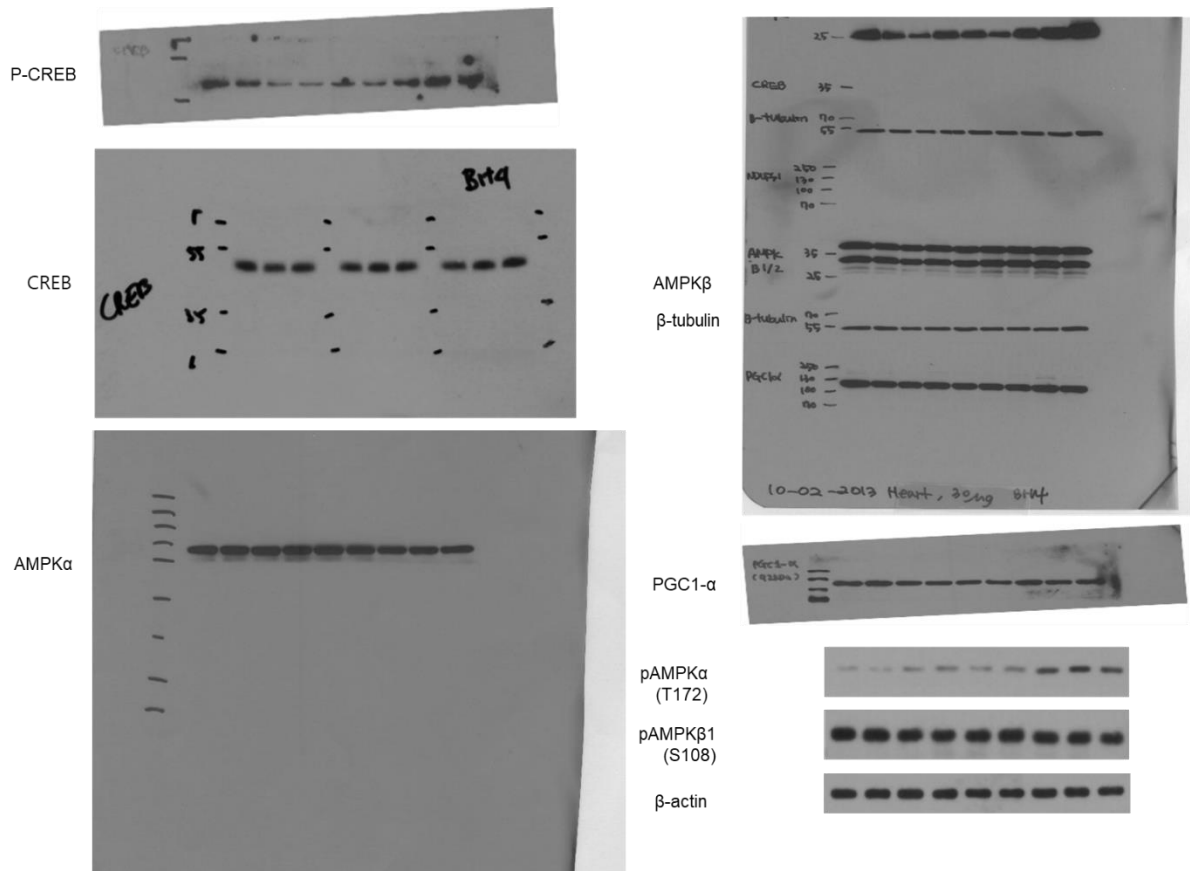

Fig 4E. WB

ATP5A  
UQCRC2

SDHB

NDUFB8

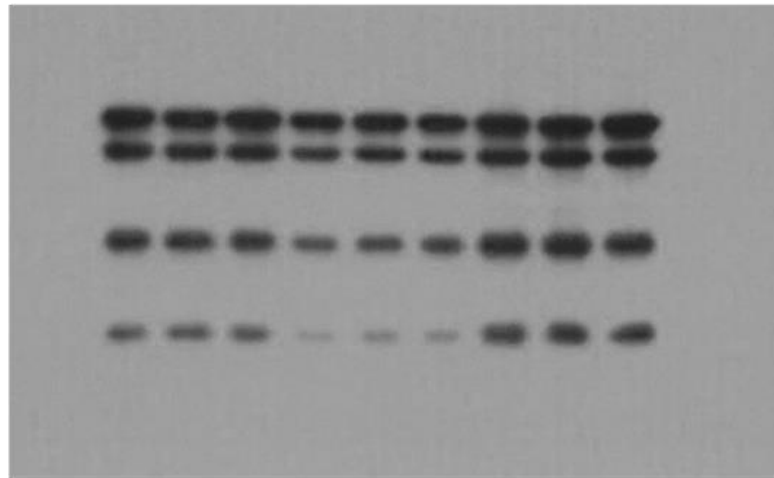

$\beta$ -actin

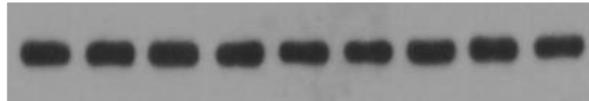

Supplement: LSA-2019-00619_SdataF4.pdf [file LSA-2019-00619_SdataF4.pdf]
