# Supplementary material for: BH4 activates CaMKK2 and rescues the cardiomyopathic phenotype in rodent models of diabetes
Source: PubMed Central journal article supplement (PMC7383063; doi:10.26508/lsa.201900619), 2020-07-22

Fig 6A. WB

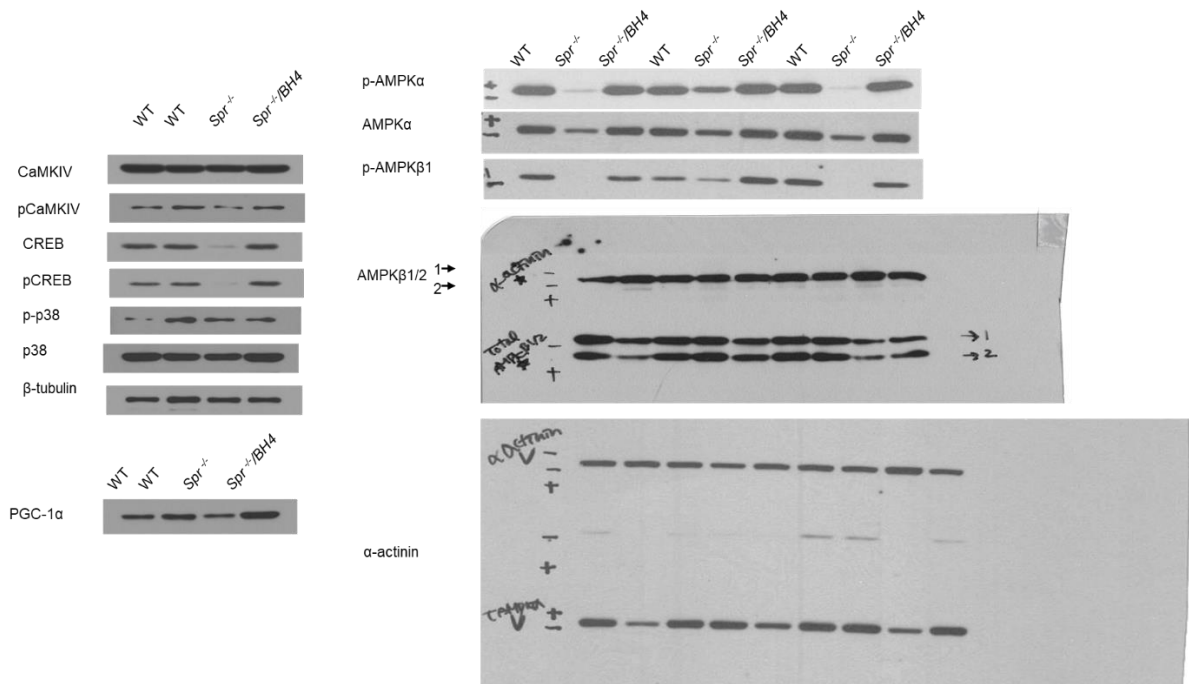

Supplement: LSA-2019-00619_SdataF6.pdf [file LSA-2019-00619_SdataF6.pdf]
